# Supplementary material for: Total synthesis of the monoterpenoidalkaloid (±)-tangutorine
Source: Royal Society of Chemistry journal article supplement (doi:10.1039/c1ob06539d), 2011-11-17

## Supporting Information

### **Total Synthesis of the Monoterpenoid Alkaloid (±)-Tangutorine**

Sebastiaan (Bas) A. M. W. van den Broek, Jaap G. H. Lemmers, Floris L. van Delft and Floris P. J. T. Rutjes\*  
*Radboud University Nijmegen, Institute for Molecules and Materials, Heyendaalseweg 135, NL-6525 AJ Nijmegen,  
The Netherlands*

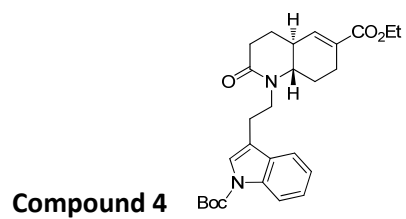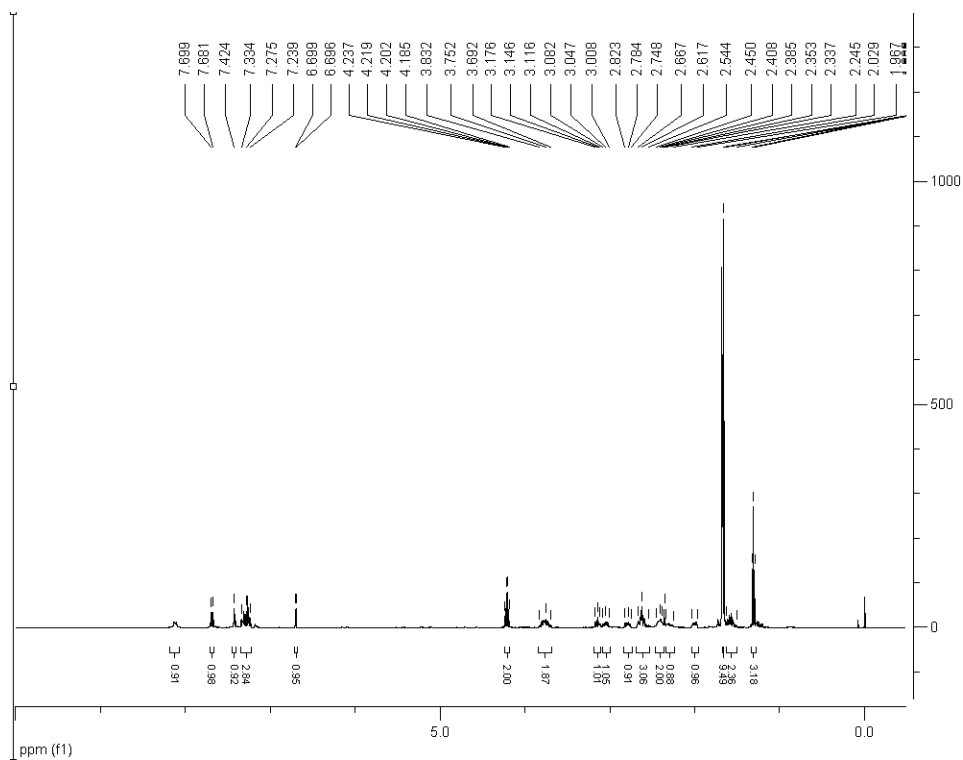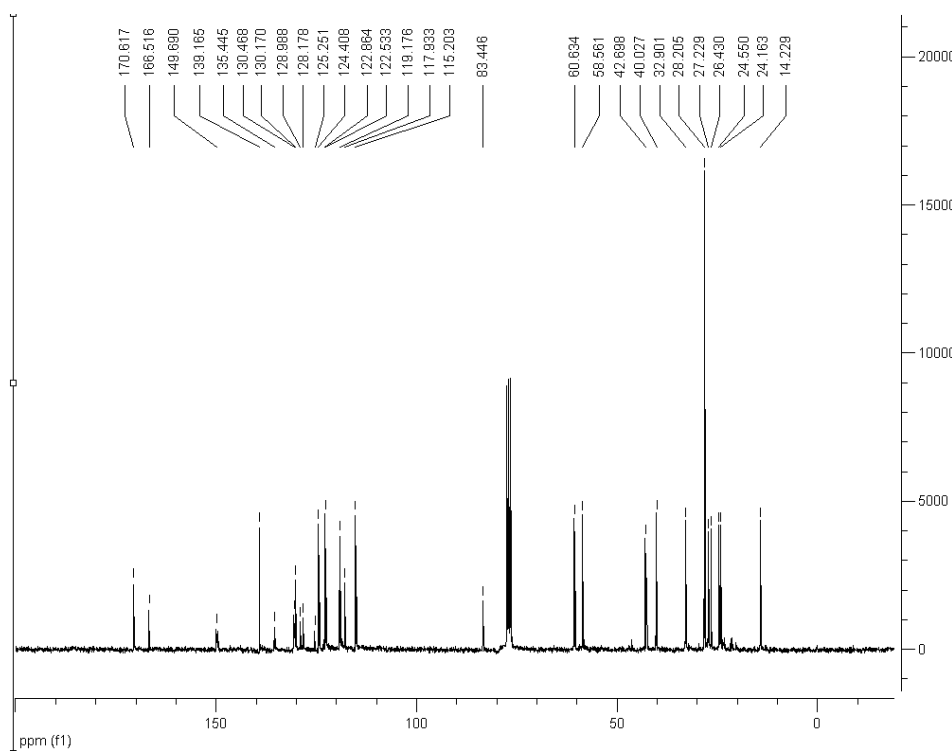

Compound 5

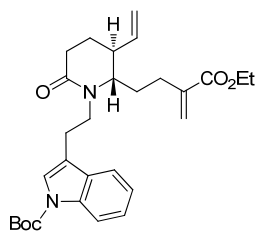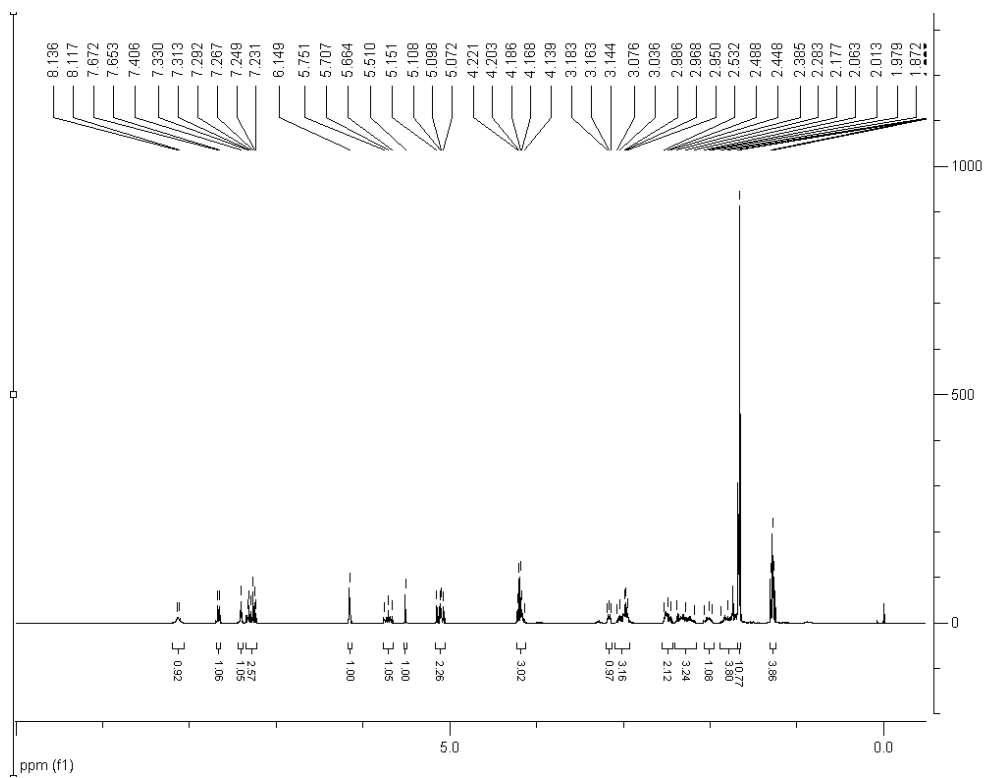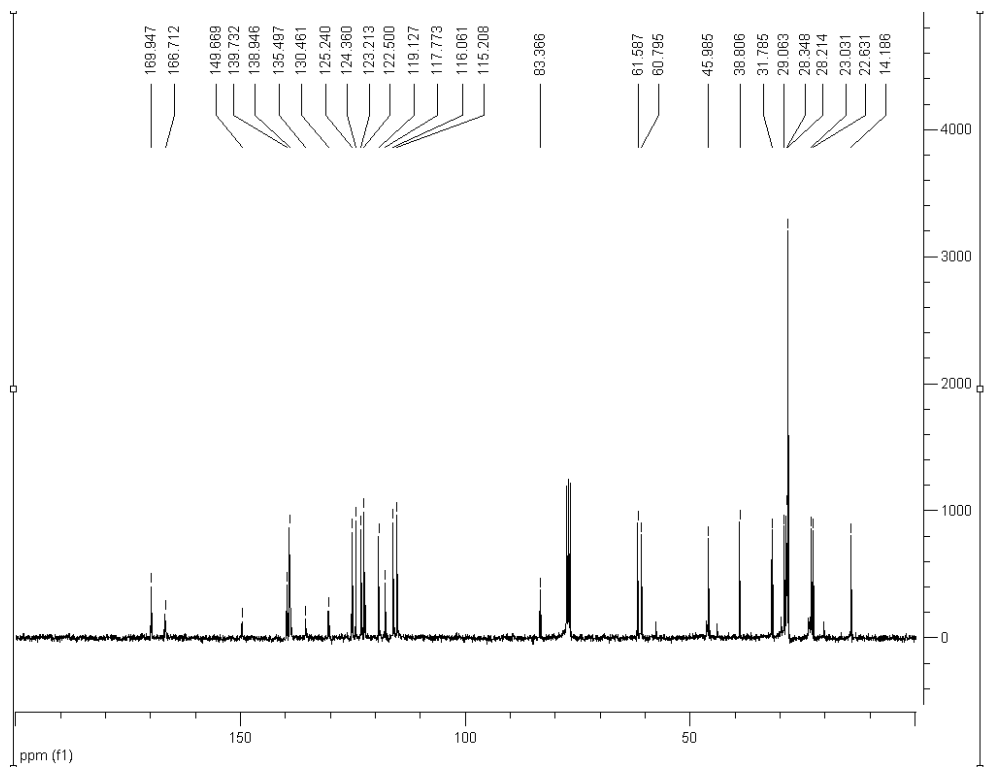



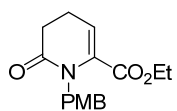

Compound 7

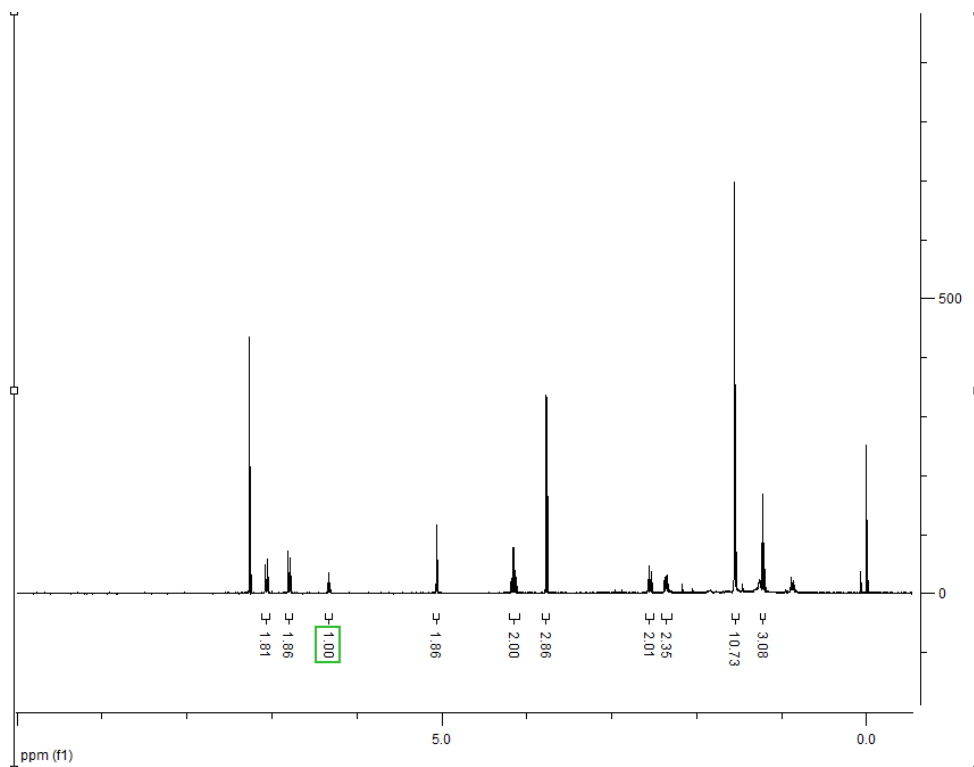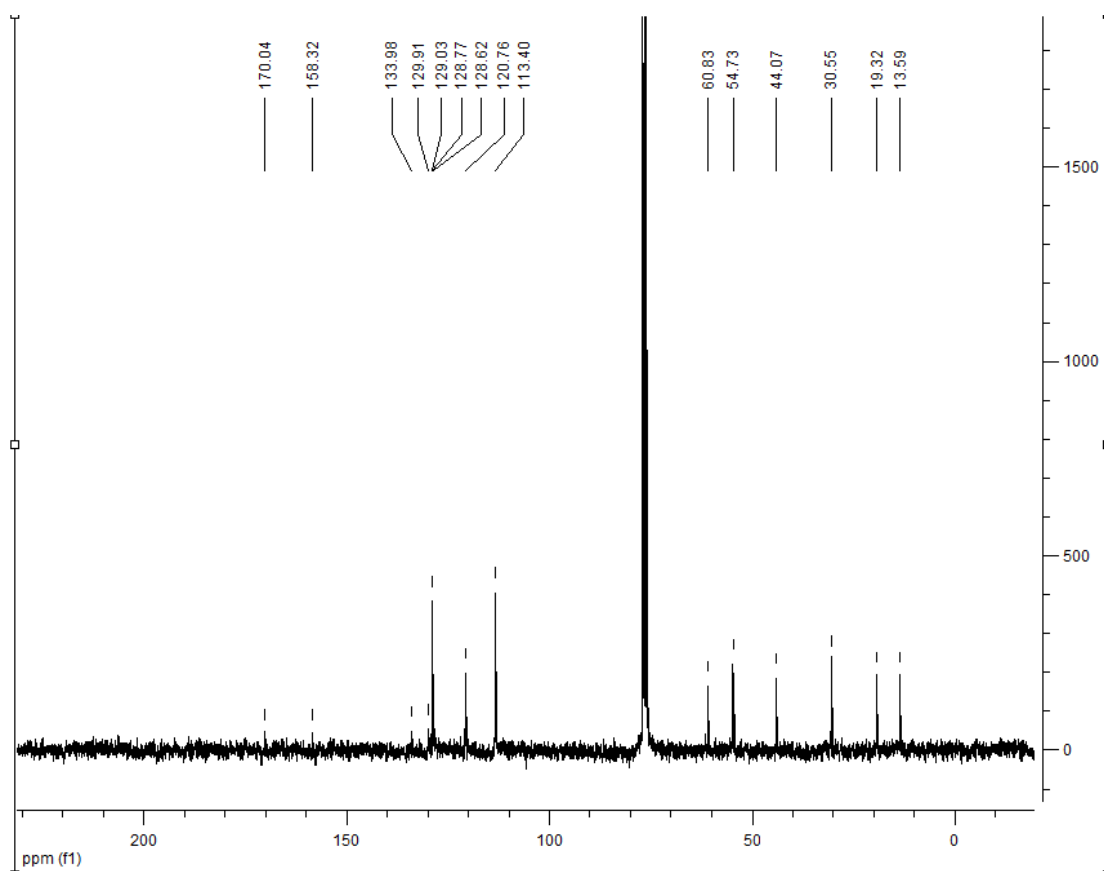

Compound 8

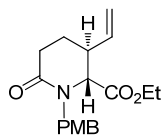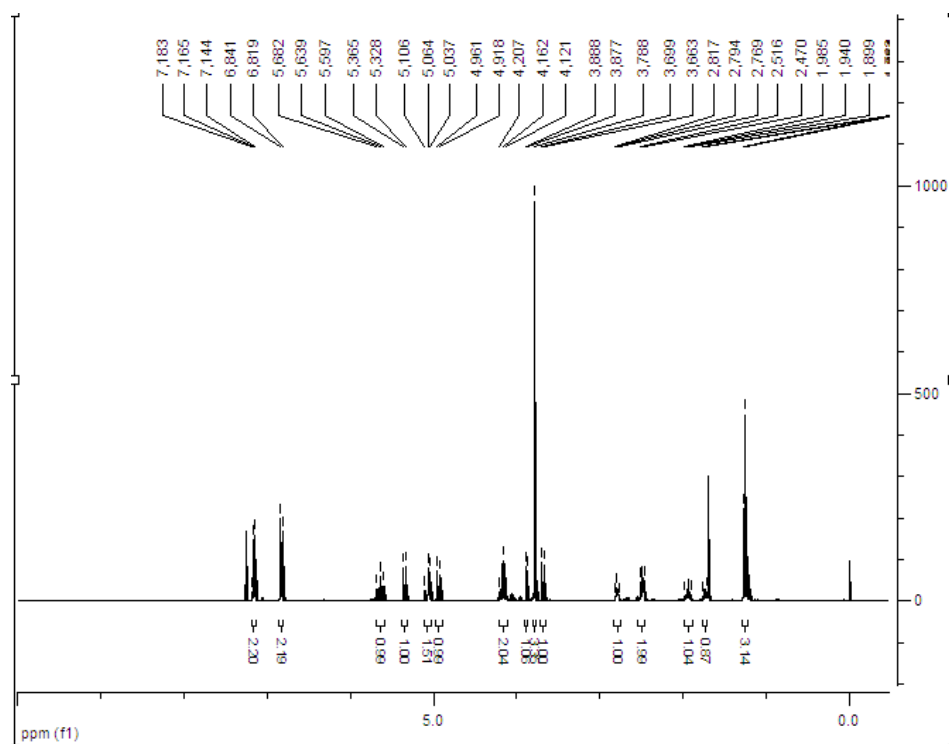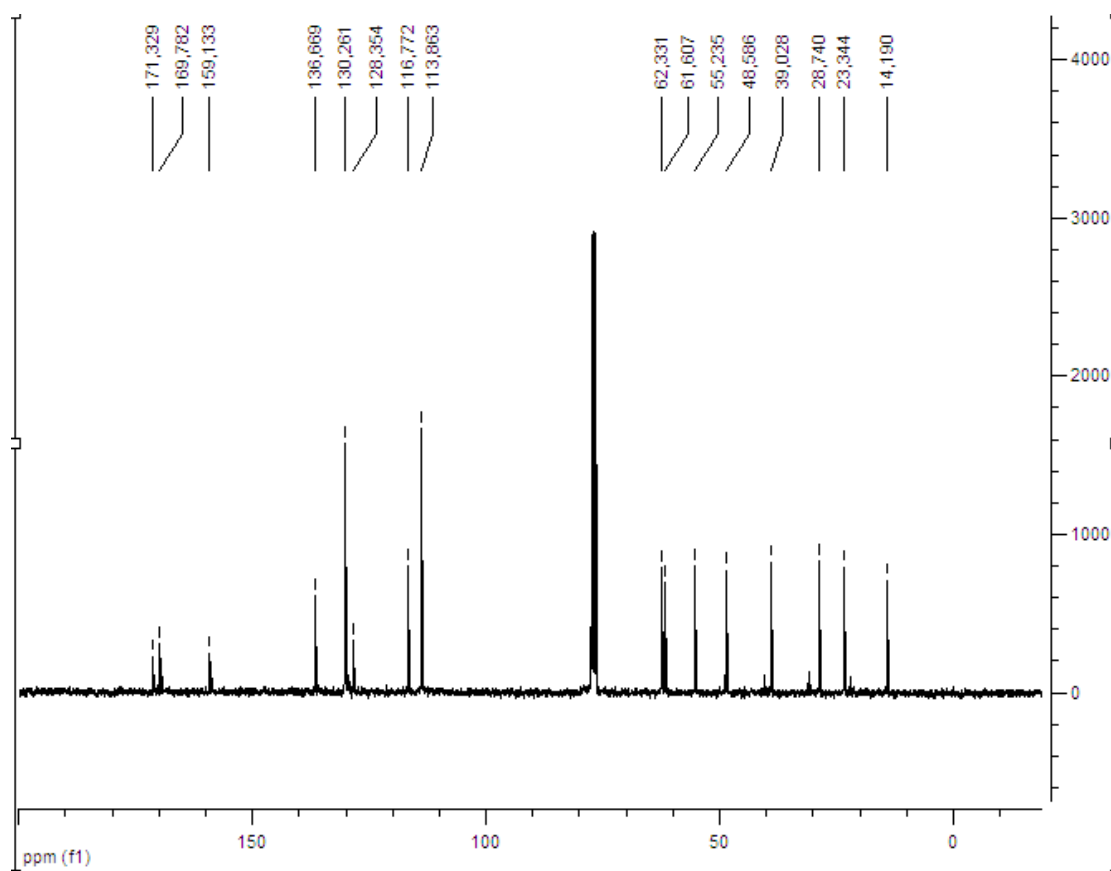

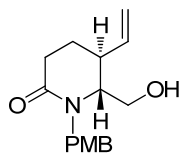

Compound 9

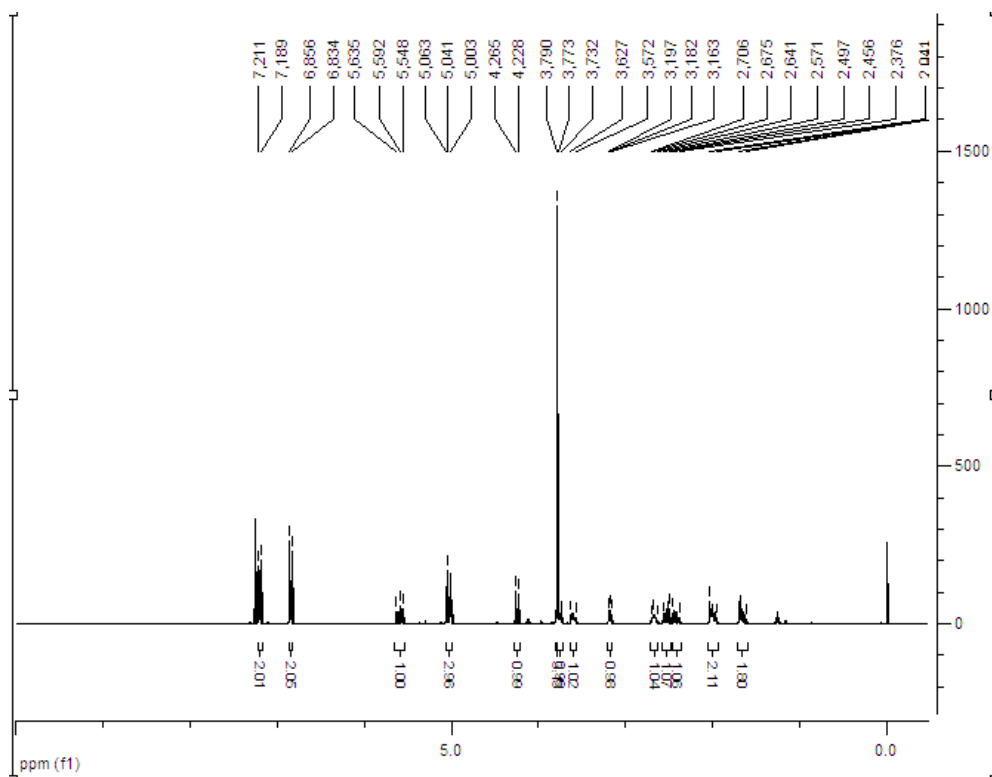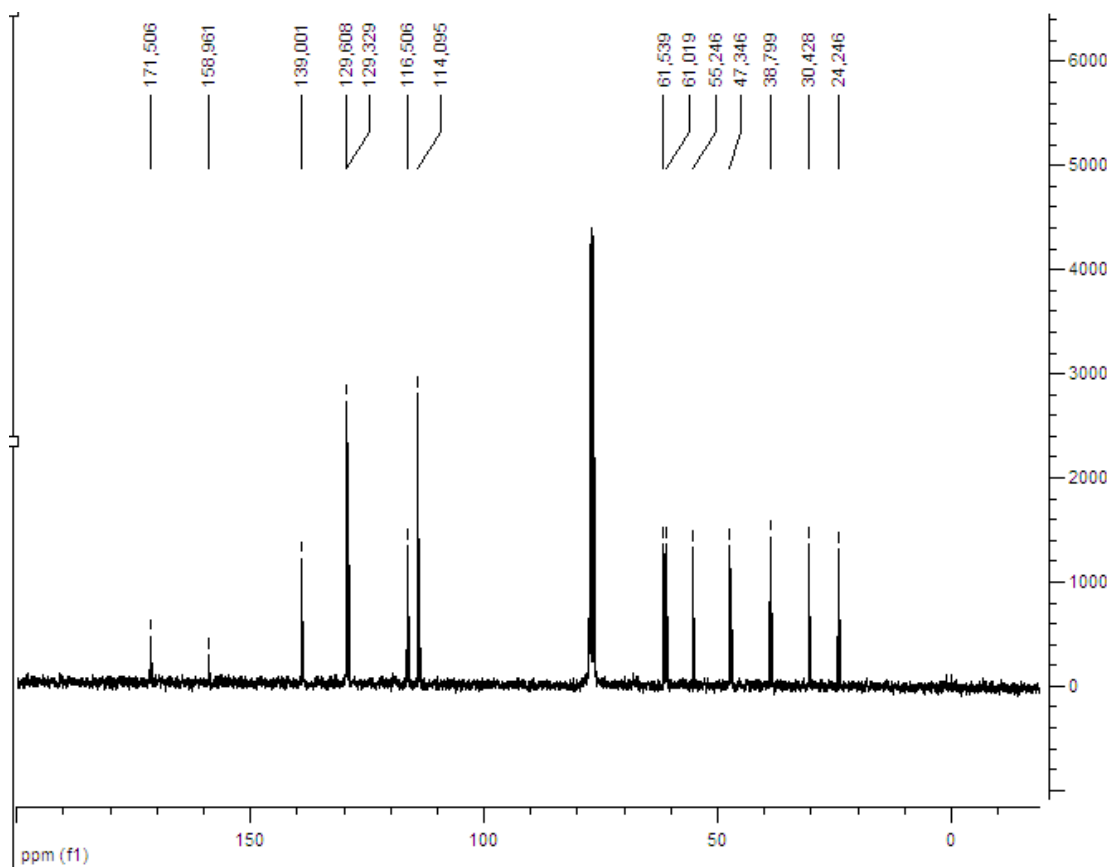





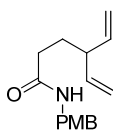

Compound 11

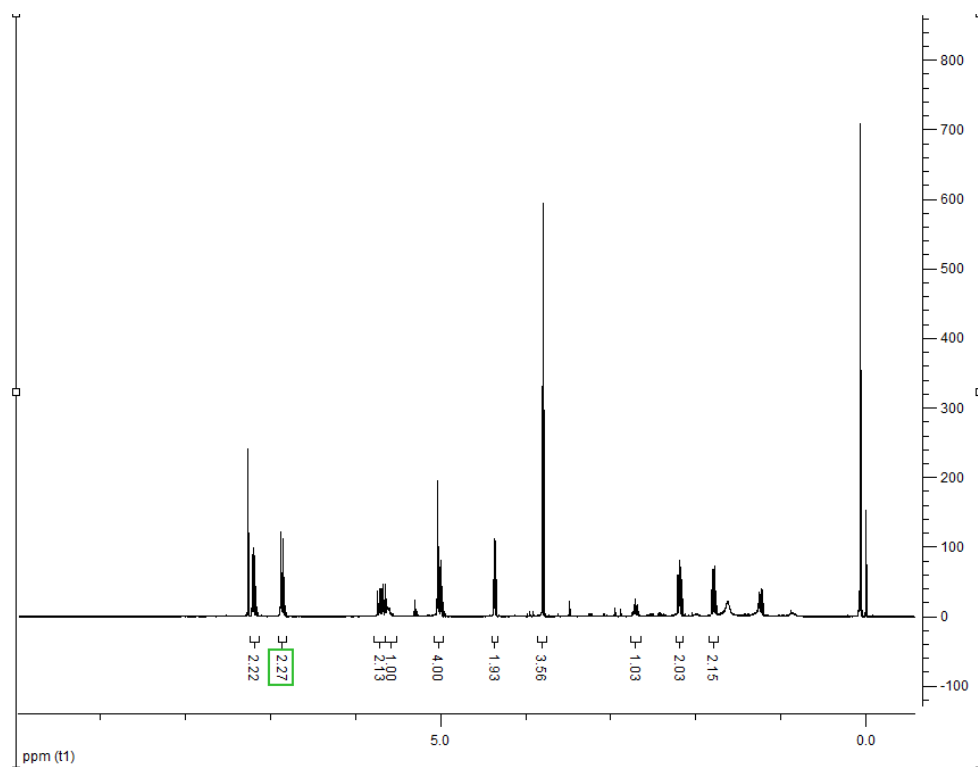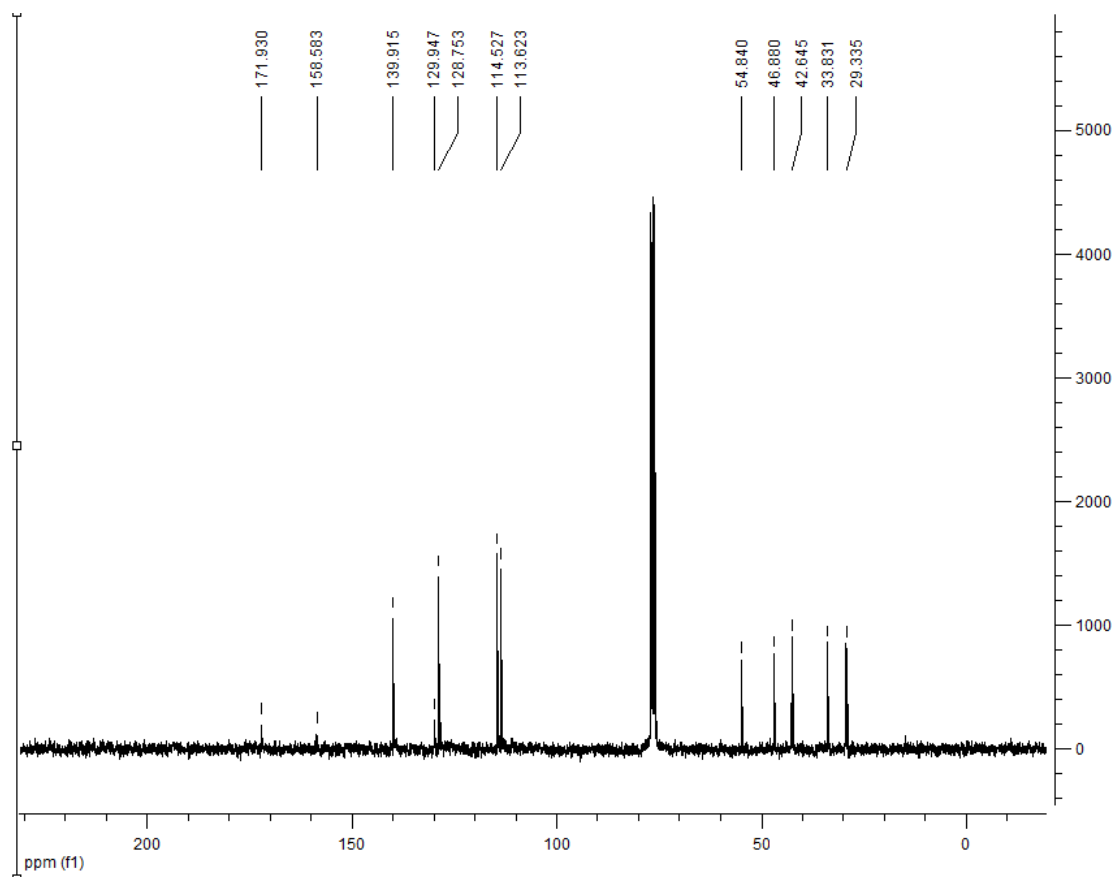

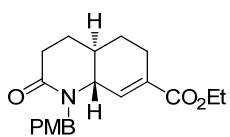

Compound 12

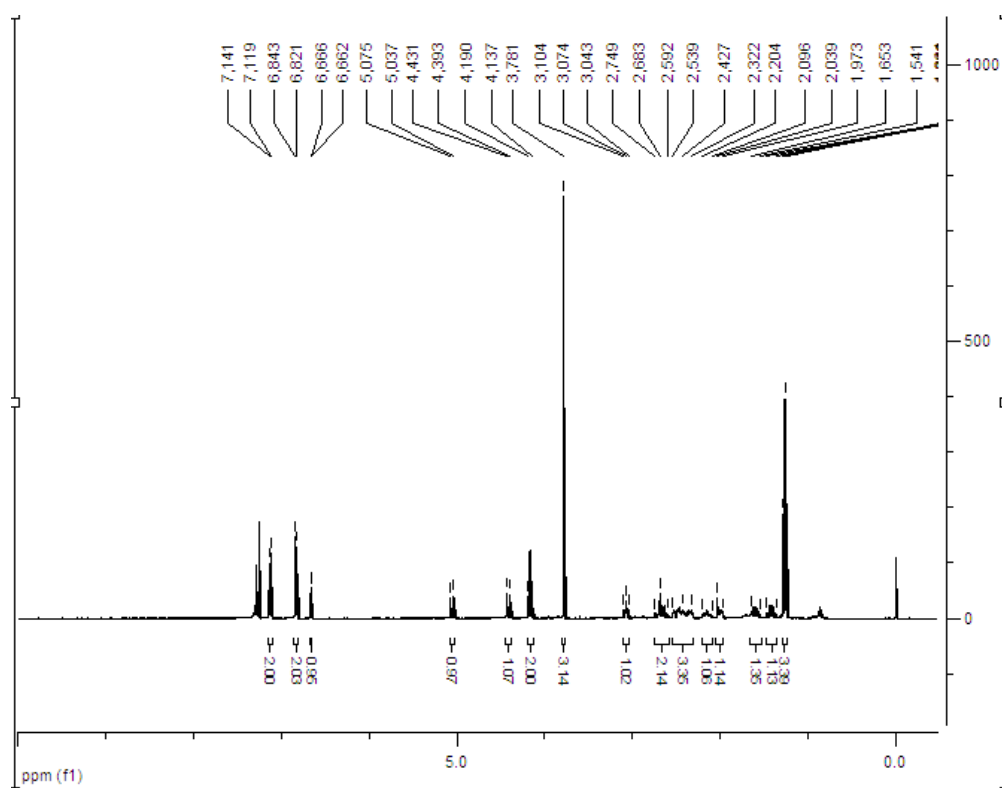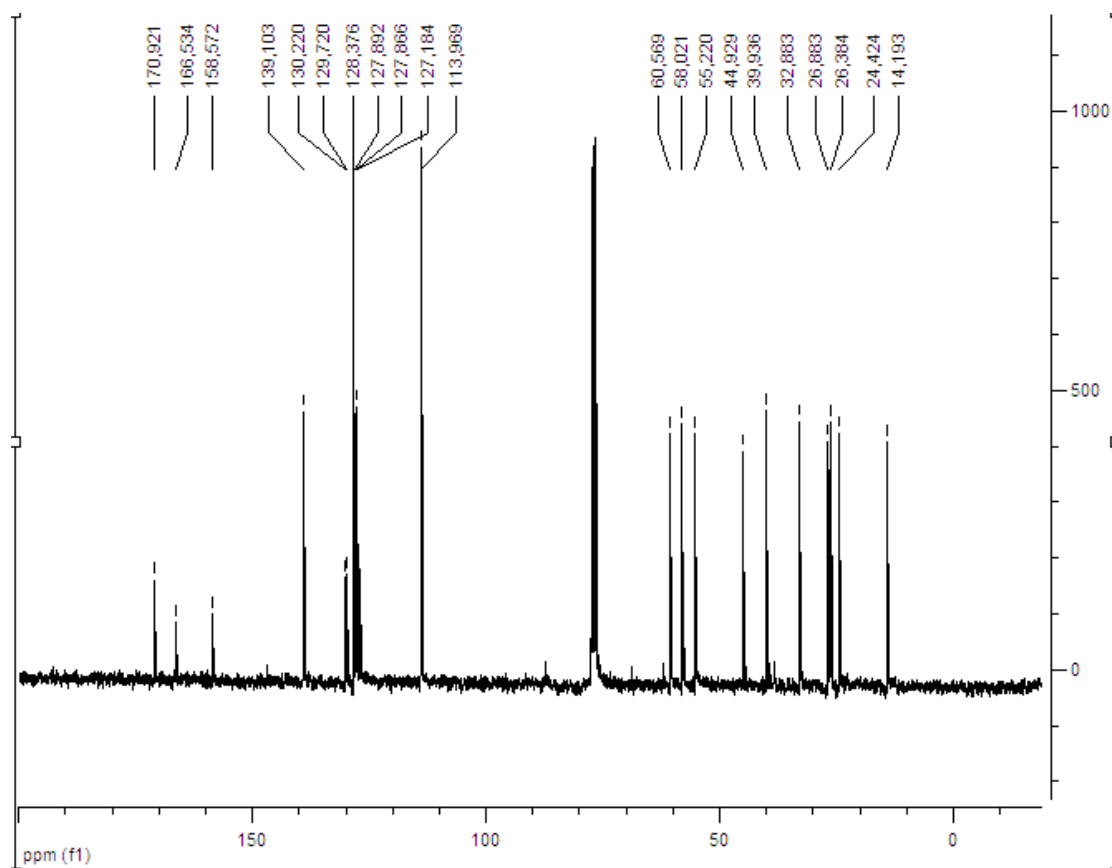

Compound 15

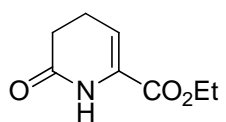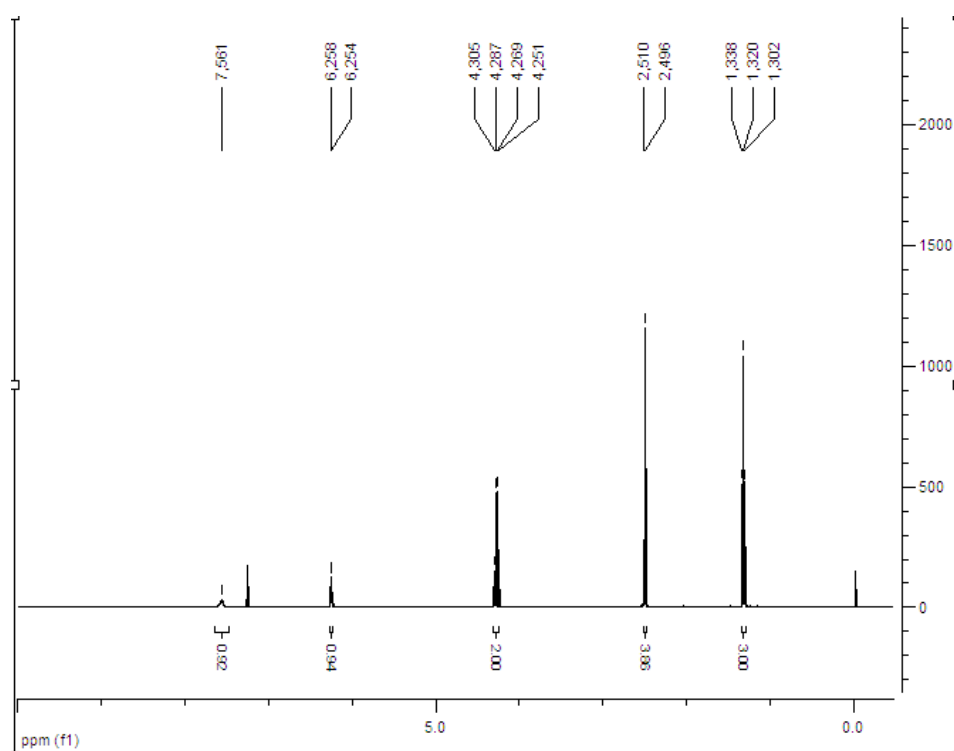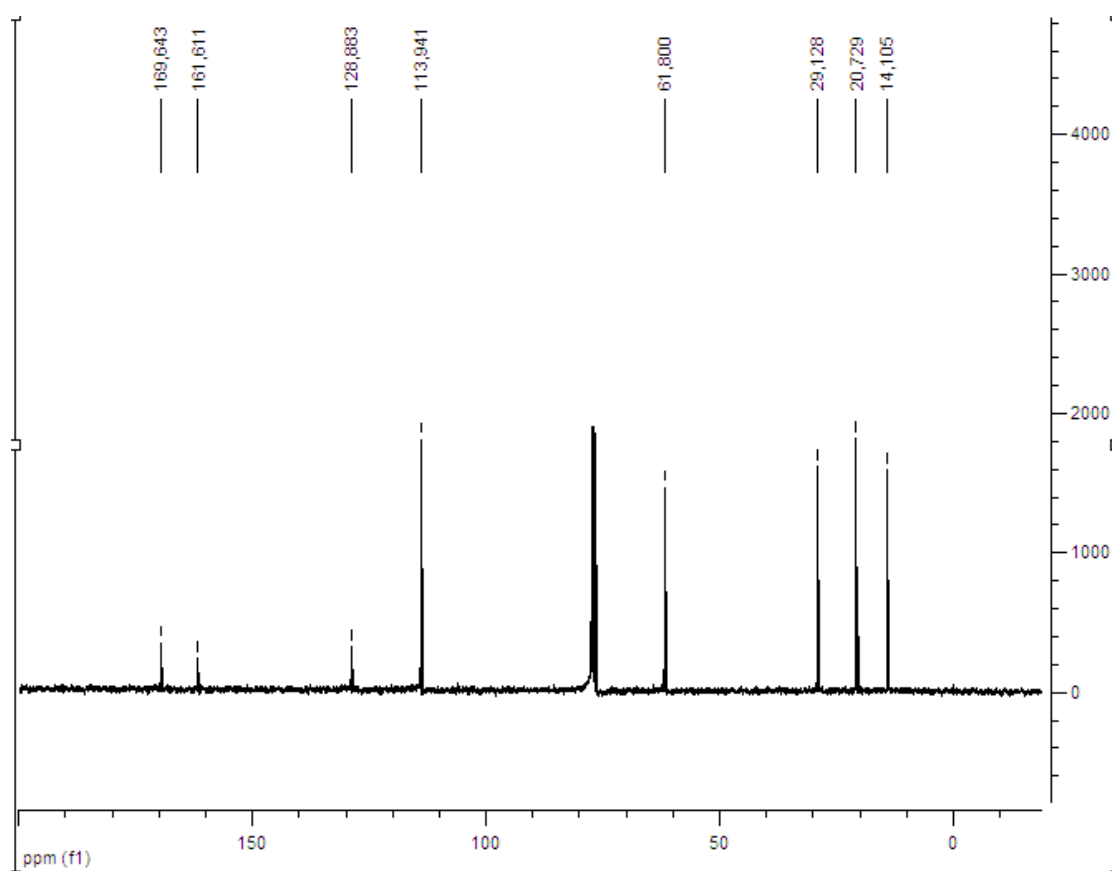

Compound 16

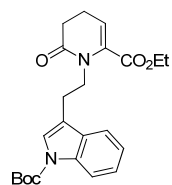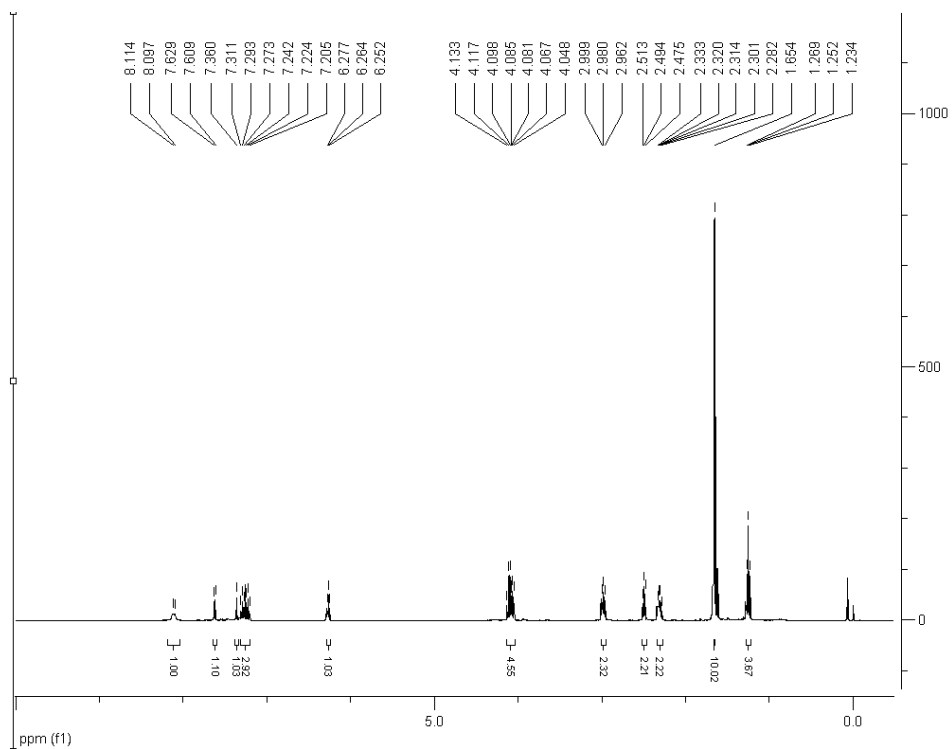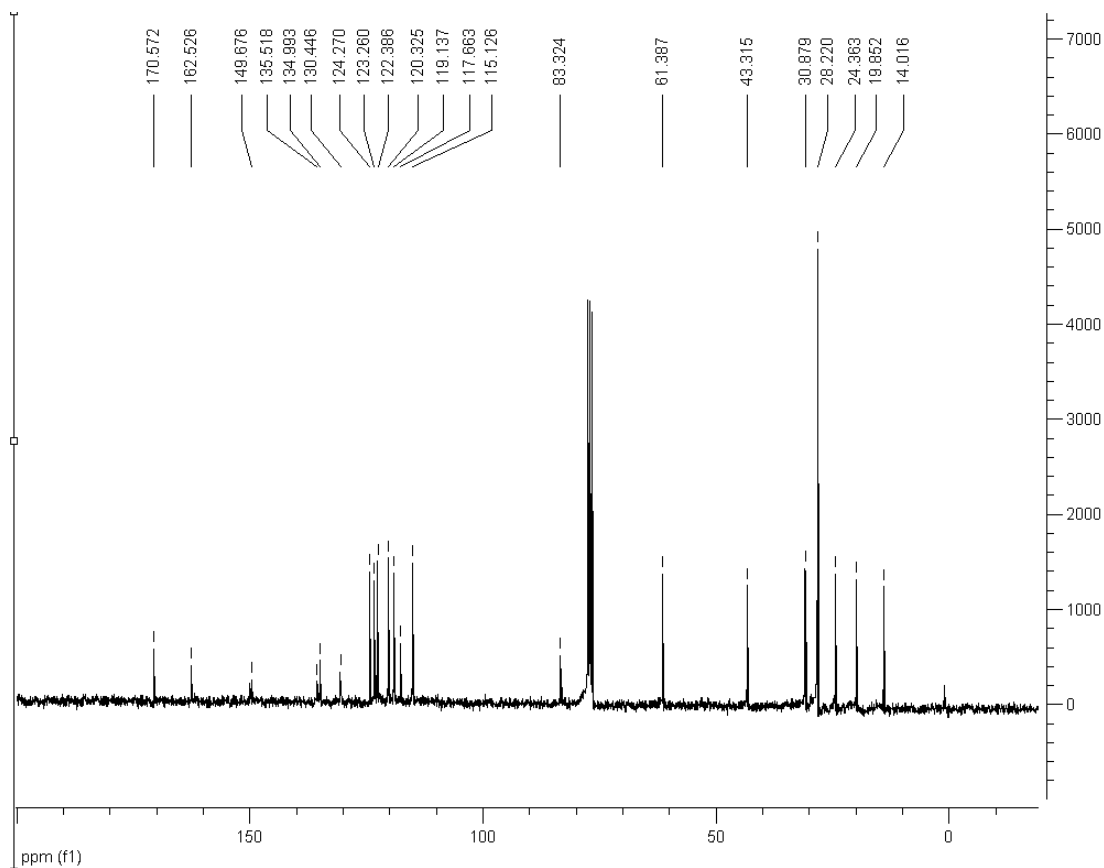

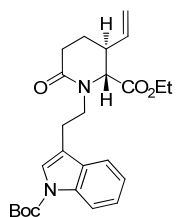

Compound 17

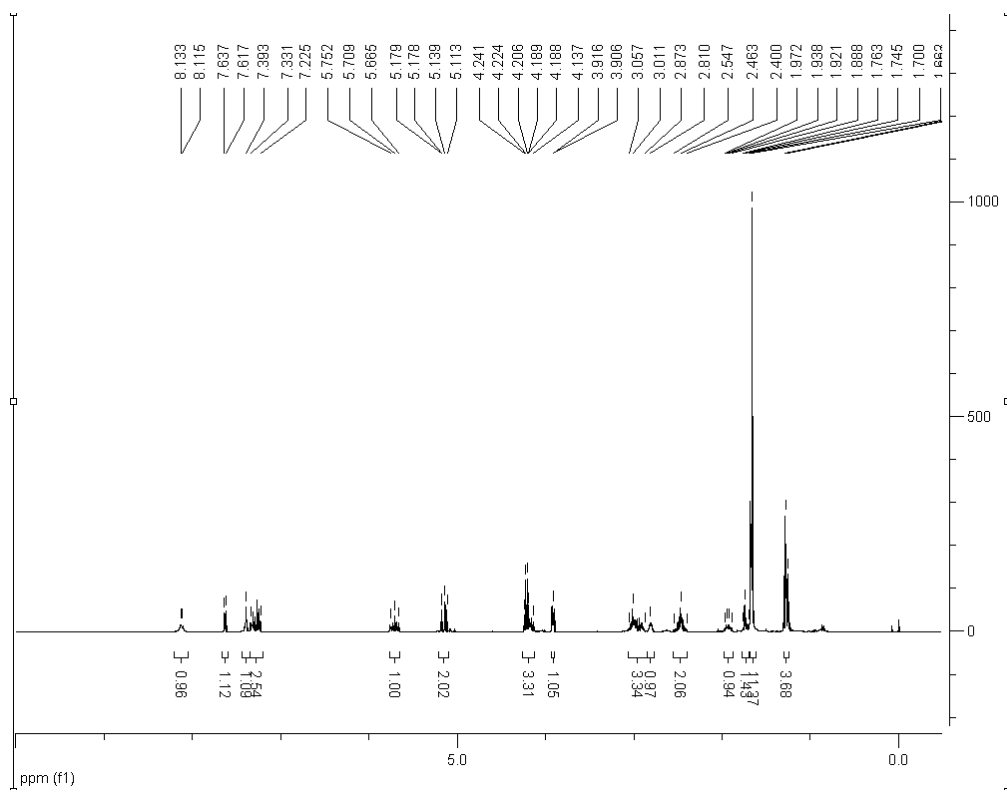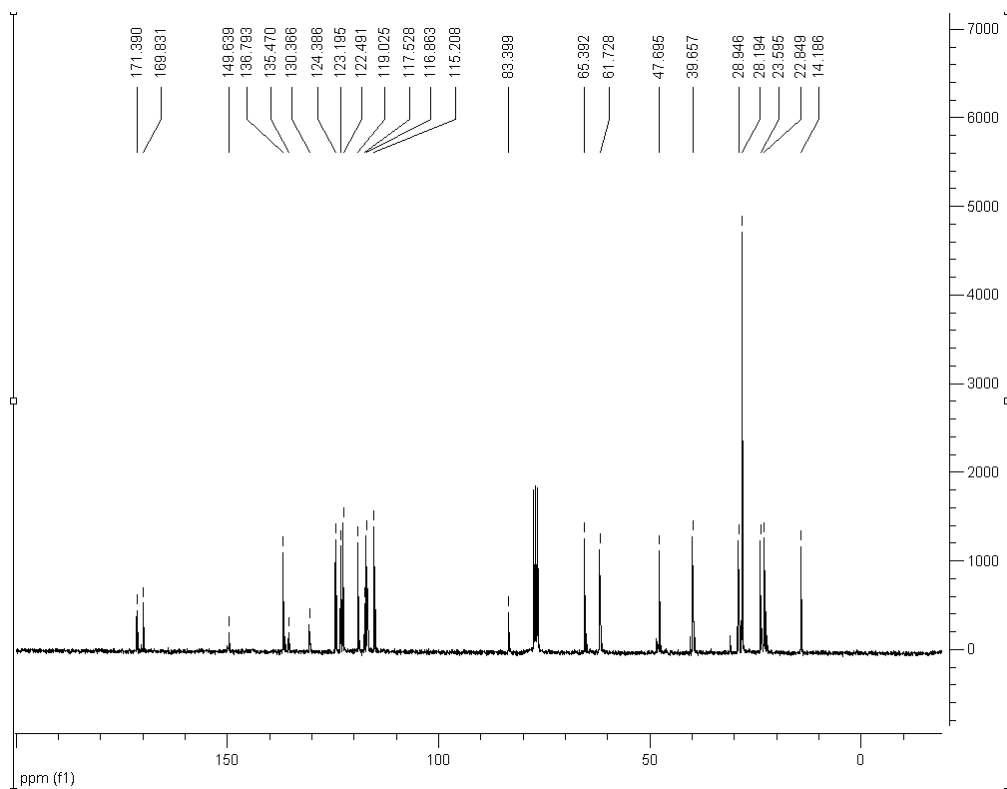

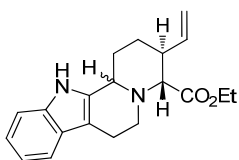

Compound 19

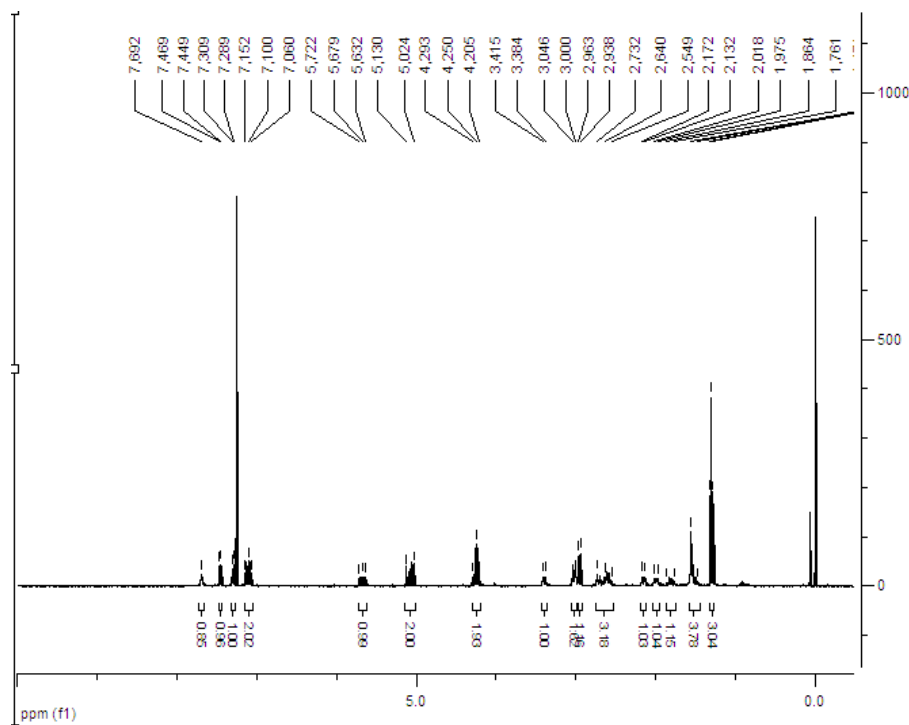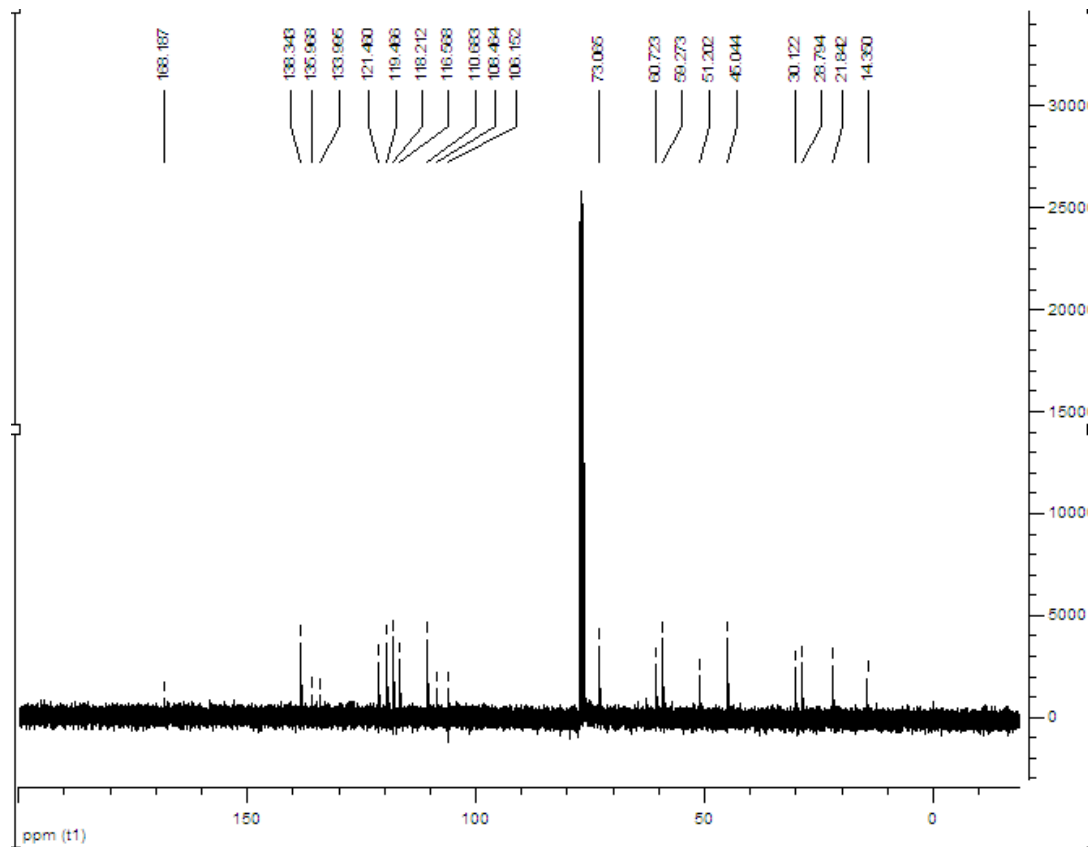

Compound 20

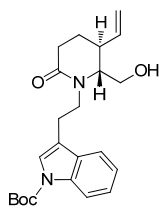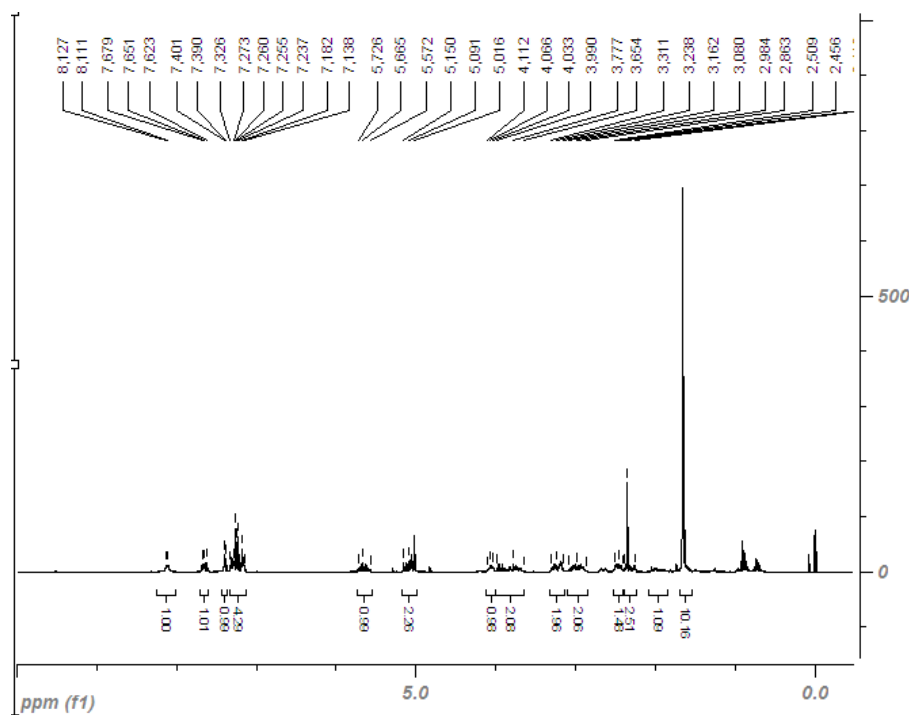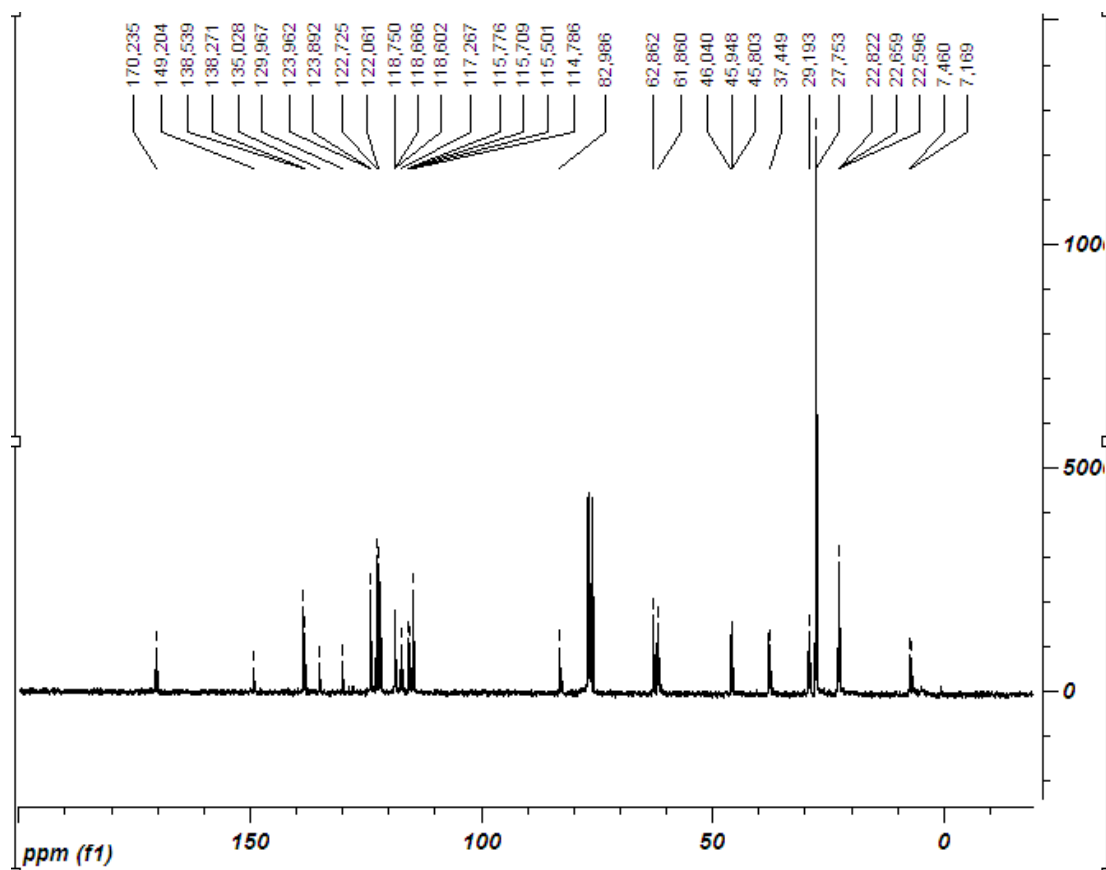

Compound 21

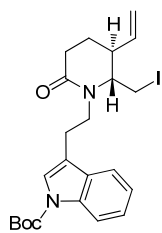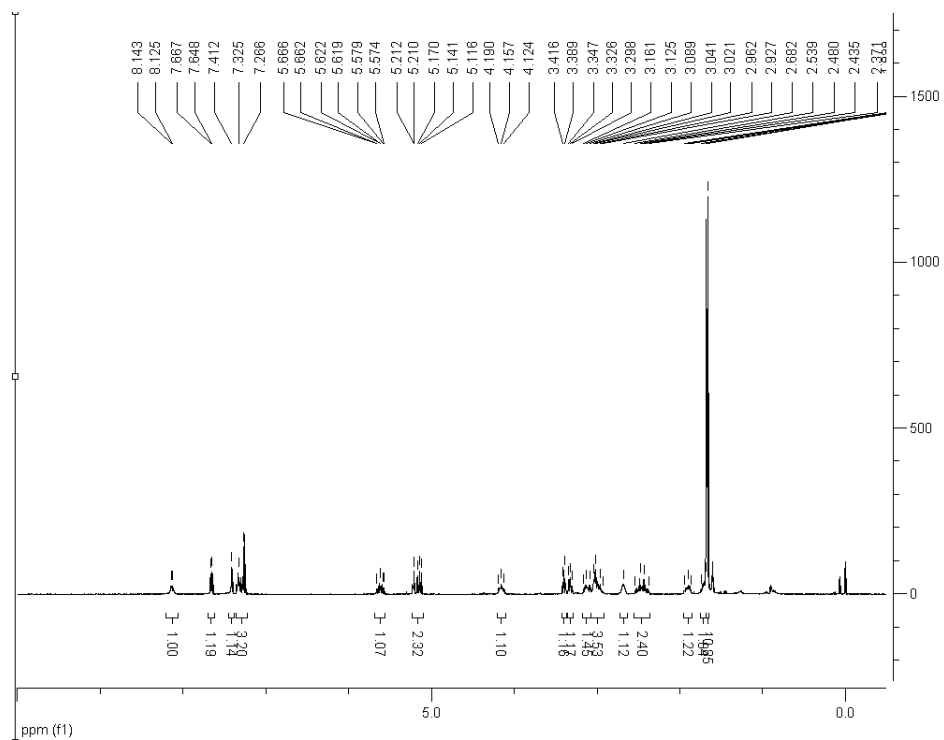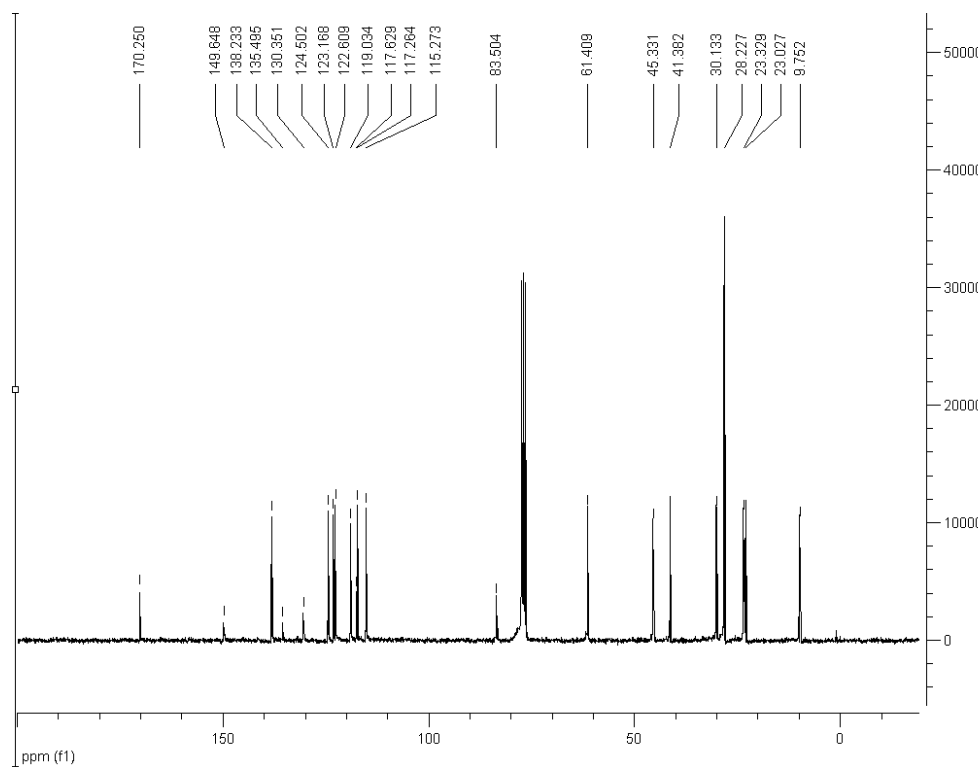



Compound 22

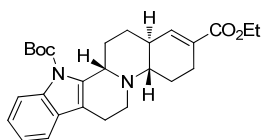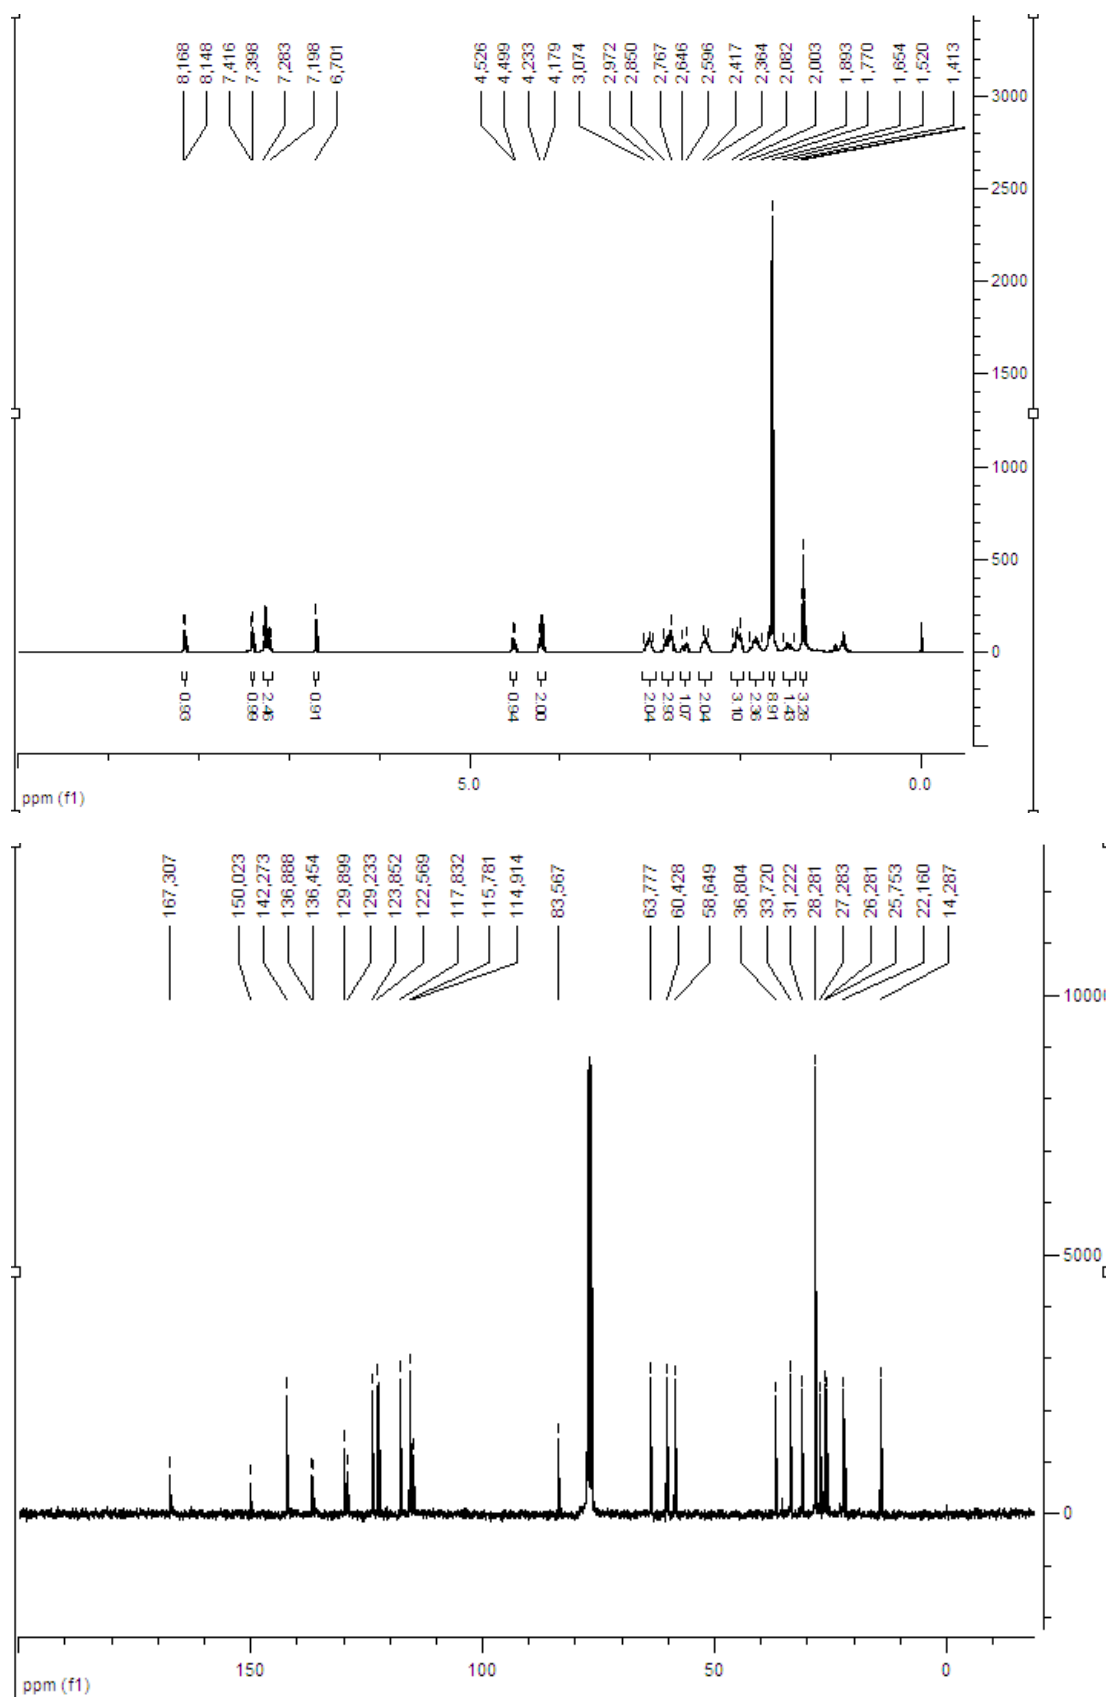

Compound 23

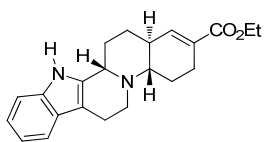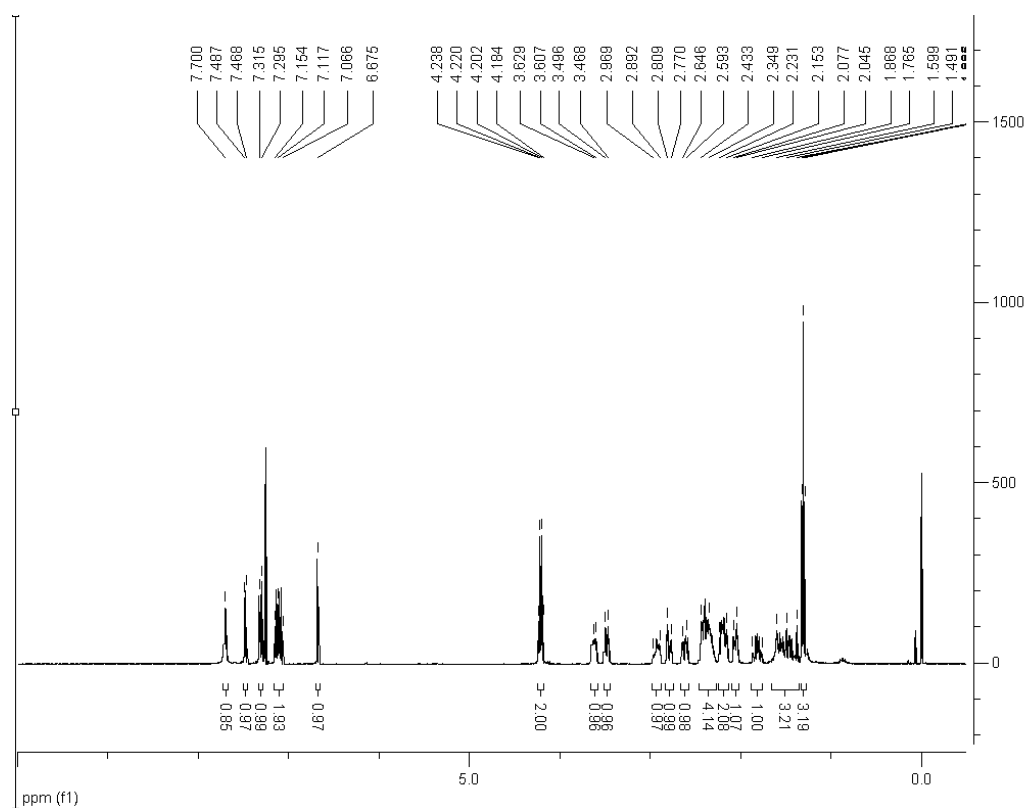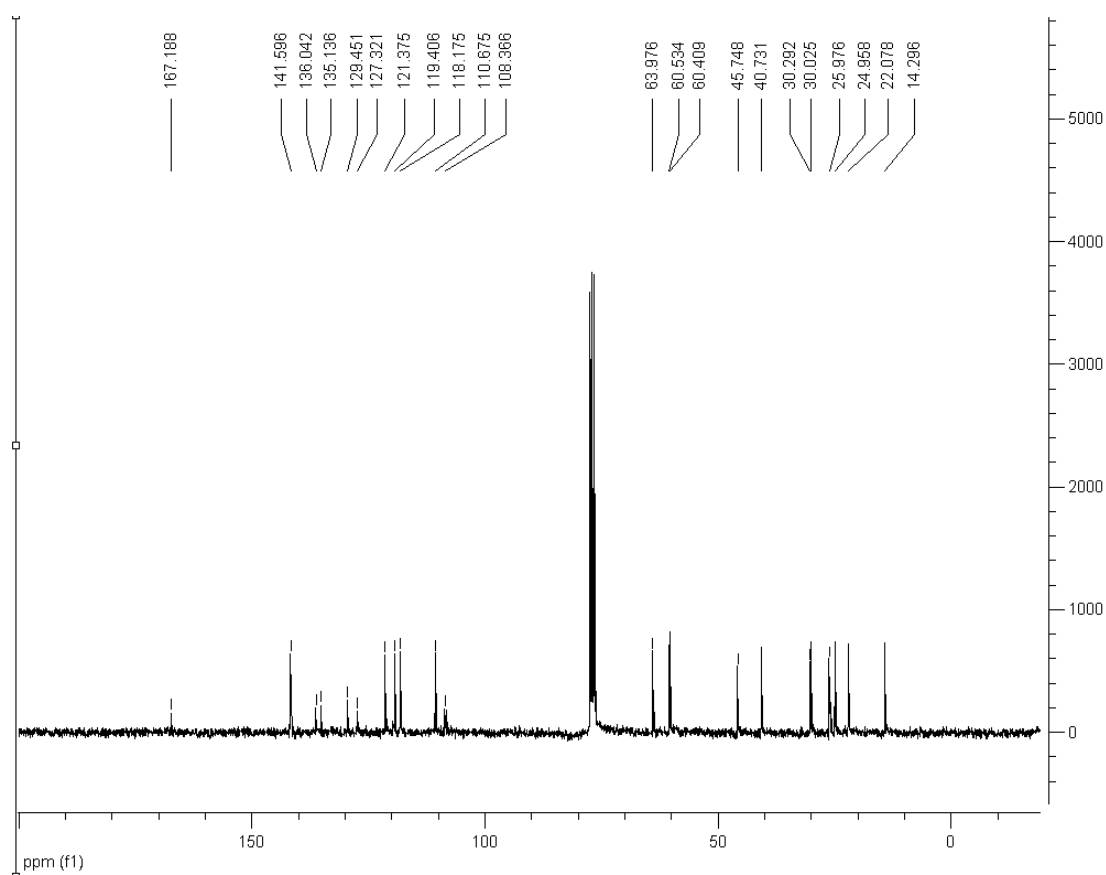

Supplement: c1ob06539d.pdf [file c1ob06539d.pdf]
